# Supplementary material
Source: Royal Society of Chemistry journal article supplement (doi:10.1039/d6tc01297c)
Supplement: d6tc01297c1.pdf [file d6tc01297c1.pdf]

## Supplementary Information

# Sn-Doping Induced Lattice Distortion and Deep-Red Self-Trapped Exciton Emission in 2D Lead Perovskites

*Yiqiang Xiao<sup>a//</sup>, Qingjing Zeng<sup>a//</sup>, Wenjuan Ma<sup>a</sup>, Di Wang<sup>a</sup>, Yuyuan Lai<sup>a</sup>, Zhiming Lin<sup>a</sup>, Qi Zhang<sup>b</sup>, Long Xu<sup>\*a</sup>, Sheng Yang<sup>\*c</sup> and Qixing Wang<sup>\*a,d</sup>*

<sup>a</sup>Department of Physics, College of Physical Science and Technology, Xiamen University, Xiamen 361005, China;

<sup>b</sup>School of Physics and Key Laboratory of MEMS of the Ministry of Education, Southeast University, Nanjing, China;

<sup>c</sup>Frontiers Science Center for Transformative Molecules, School of Chemistry and Chemical Engineering, Shanghai Jiao Tong University, Shanghai 200240, China;

<sup>d</sup>Jiujiang Research Institute, Xiamen University, Jiujiang 332000, China;

// These authors contributed equally to this work.

Corresponding author: Long Xu (Email: [xulong@xmu.edu.cn](mailto:xulong@xmu.edu.cn)), Sheng Yang (Email: [sheng.yang@sjtu.edu.cn](mailto:sheng.yang@sjtu.edu.cn)), and Qixing Wang (Email: [phyqxw@xmu.edu.cn](mailto:phyqxw@xmu.edu.cn))

### Supplementary sections

- S1. Morphology and thickness characterization of a Sn-doped PEPI flake
- S2. Temperature-dependent emission intensity ratio
- S3. Temperature dependence of emission peak positions
- S4. Frequency response characteristics of the BLED
- S5. Response waveforms of the BLED
- S6. Response waveforms of the PEPI+BLED

### S1. Morphology and thickness characterization of a Sn-doped PEPI flake

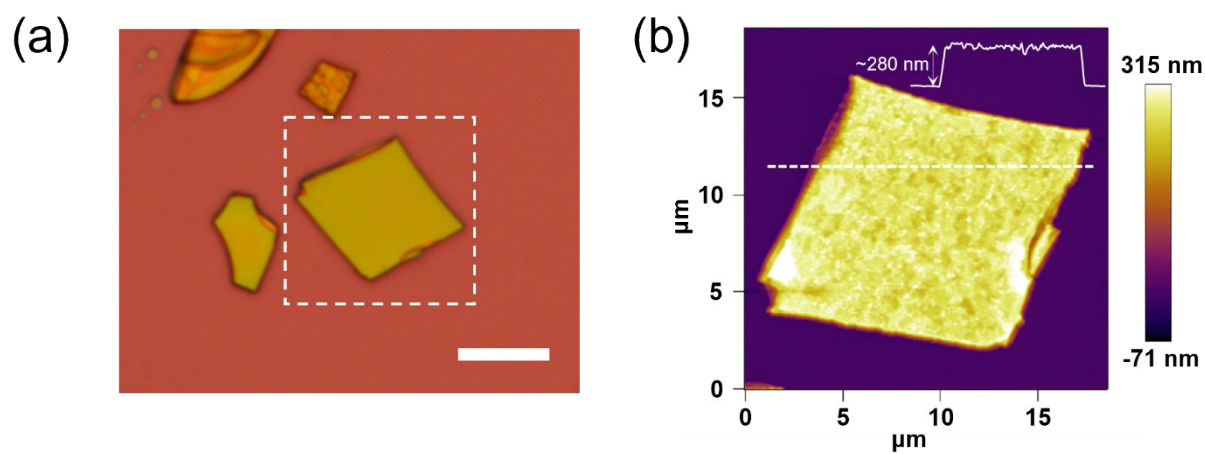

**Fig. S1** (a) Optical microscopy image of Sn-doped PEPI flakes. The white dashed box marks the AFM scanning area. Scale bar: 10 μm. (b) Corresponding AFM height image. The inset shows the height profile extracted along the white dashed line, indicating the flake thickness of approximately 280 nm.

## S2. Temperature-dependent emission intensity ratio

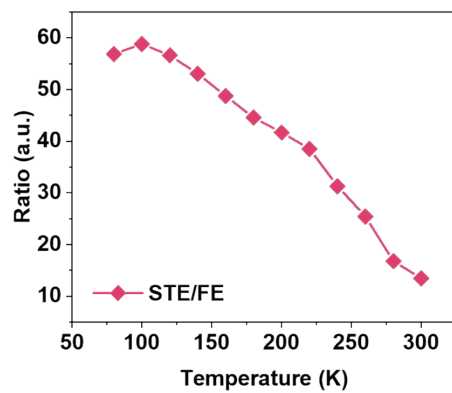

**Fig. S2** Integrated intensity ratio of STE to FE as a function of temperature from 80 K to 300 K.

### S3. Temperature dependence of emission peak positions

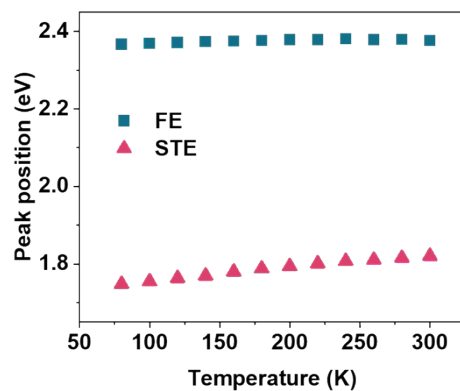

**Fig. S3** Emission peak energies of FE and STE as a function of temperature.

#### S4. Frequency response characteristics of the BLED

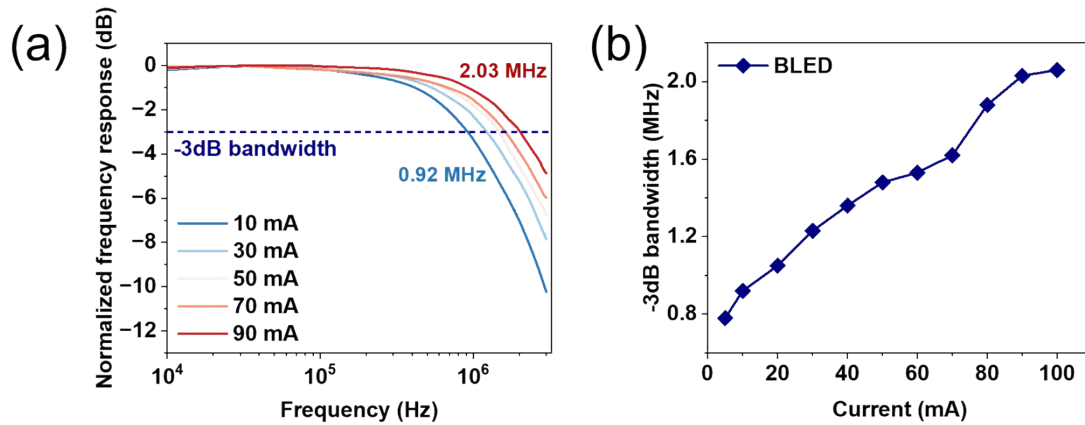

**Fig. S4 (a)** Frequency response of the BLED under various driving currents from 10 mA to 90 mA. The blue dashed line indicates the -3dB bandwidth level. The -3dB bandwidths for 10 mA and 90 mA are labeled as 0.92 MHz and 2.03 MHz, respectively. **(b)** The -3dB bandwidth as a function of driving current. The AC modulation voltage is a 400 mV<sub>pp</sub> sine wave.

## S5. Response waveforms of the BLED

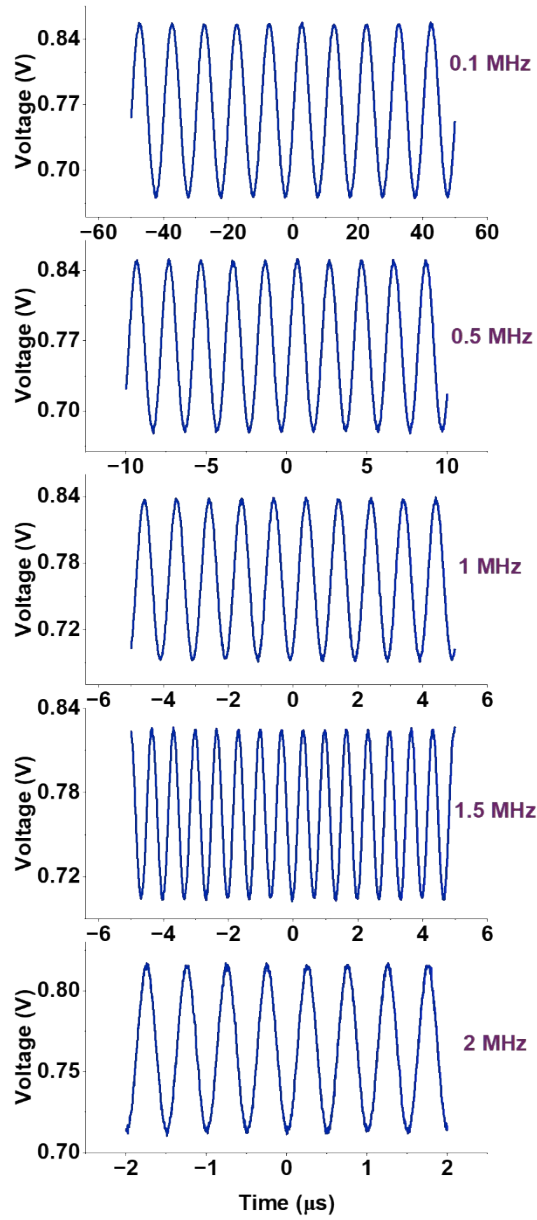

**Fig. S5** Response waveforms of the BLED with a 30 mA driving current under sinusoidal modulation ( $400 \text{ mV}_{pp}$ ) from an AWG at frequencies of 0.1 MHz, 0.5 MHz, 1 MHz, 1.5 MHz, and 2 MHz.

## S6. Response waveforms of the PEPI+BLED

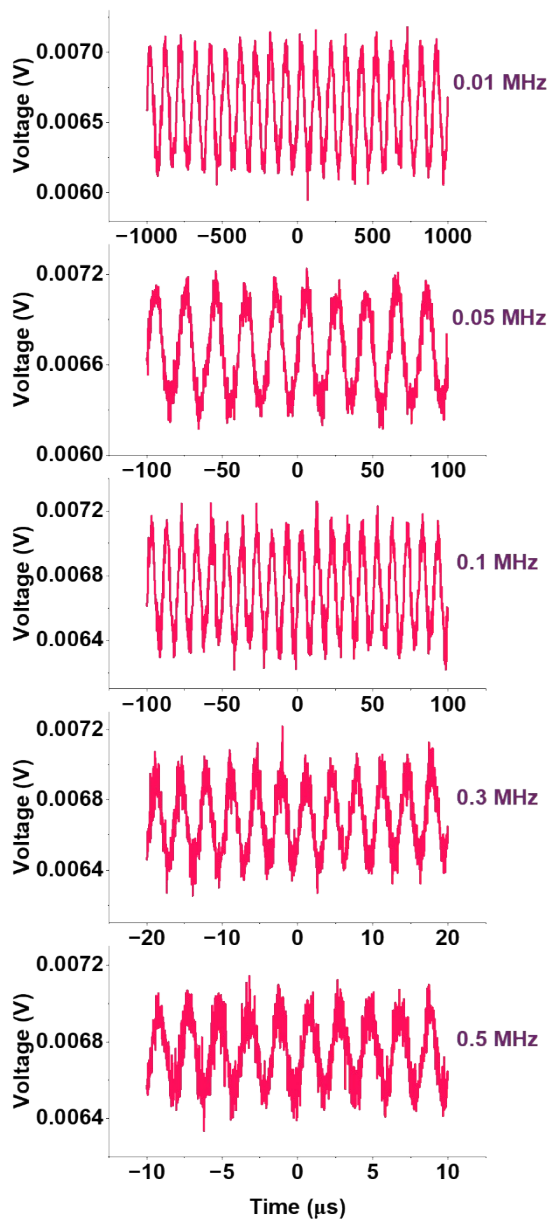

**Fig. S6** Response waveforms of the PEPI+BLED with a 30 mA driving current under sinusoidal modulation (400 mV<sub>pp</sub>) from an AWG at frequencies of 0.01 MHz, 0.05 MHz, 0.1 MHz, 0.3 MHz, and 0.5 MHz.
